# Supplementary material
Source: publisher site journal article supplement (https://www.dovepress.com/article/402687)
Supplement: Supplementary file 1 [file get_supplementary_file.php]

**Supplementary file 1. Inclusion and exclusion criteria and steps for bariatric surgery**

**Patient inclusion criteria were as follows:**

1. Body mass index (BMI) ≥32.5 kg/m2 with or without type 2 diabetes mellitus (T2DM).
2. 27.5 kg/m2 <BMI <32.5 kg/m2 with T2DM but failed conservative treatment combined with at least two metabolic diseases or comorbidities.
3. Duration of T2DM ≤15 years with fasting C-peptide ≥50% of the normal lower limit.
4. Waist circumference: male ≥90 cm, female ≥85 cm.
5. Age within 16-65 years.

**The exclusion criteria were as follows:**

1. Age <16 or＞65 years.
2. Other types of diabetes (e.g., type 1 diabetes mellitus, gestational diabetes mellitus, and other specific types).
3. In the past three months, patients with a previous history of myocardial infarction, cerebral hemorrhage, severe hepatorenal dysfunction, acute infection, and stress conditions.
4. Pregnant and lactating women.
5. Patients with a malignant tumor, a history of liver surgery, a serious and uncontrollable medical condition, or mental illness limited their ability to comply with the study requirements.

**Supplementary file 2. The laparoscopic sleeve gastrectomy (LSG) process is as follows:**

Pneumoperitoneum (15 mmHg) was created by inserting a Veress needle in the navel. Patients adopted a reverse Trendelenburg and left-side up a position with their legs separated to form an “A” shape. The greater curvature of the stomach is sufficiently dissociated from the His angle by approximately 3 cm above the gastric pylorus. A 32 Fr Bougie tube was placed from the mouth into the stomach. Once the tip of the Bougie tube has passed through the pylorus, the 60 mm endoscopic staplers are placed in position and the gastric antrum is incised with the cartridge attached to the 32 Fr Bougie tube. The stomach tissue was then gradually separated from approximately 3 cm above the pylorus to the His angle, and the entire stomach fundus was removed. Approximately 1 cm of stomach tissue was retained in the His angle to reduce the incidence of gastroesophageal reflux disease. No blue methylene tests or drain tubes were applied. All of the fascial defects were closed with 2-0 absorbable sutures.

**Supplementary file 3. 850 K methylation microarray**

Visceral fat tissue is collected during the surgery. DNA was isolated from Tissue Kit (Qiagen). The purity and concentration of DNA were estimated using Nanodrop 2000 (ThermoScietific). Approximately 500 ng of genomic DNA from each sample was used for sodium bisulfite conversion using the EZ DNA methylation Gold Kit (Zymo Research, USA), following the manufacturer's standard protocol. According to the manufacturer's instructions, genome-wide DNA methylation was assessed using the Illumina Infinium HumanMethylation850K BeadChip (Illumina Inc, USA). The array data were analyzed using the ChAMP package in R for deriving the methylation level. The methylation status of all the probes was denoted as β-value, which is the ratio of the methylated probe intensity to the overall probe intensity (sum of methylated and unmethylated probe intensities plus constant α, where α = 100).

| Supplementary Table 1. Clinical information of patients in different subgroups | | | |
| --- | --- | --- | --- |
|  | Group-A | Group-B | *P* |
| Age(years) | 36(22-41) | 32(22-54) | 0.65 |
| Sex |  |  | 1 |
| Male | 9 | 8 |  |
| Female | 4 | 5 |  |
| WHR | 0.95(0.81-1.34) | 0.99(0.79-1.06) | 1 |
| BMI(kg/m2) | 46.62±4.71 | 46.26±8.29 | 0.88 |
| Marital status |  |  | 0.411 |
| Married | 3 | 6 |  |
| Unmarried | 10 | 7 |  |
| T2DM |  |  | 0.411 |
| No | 6 | 3 |  |
| Yes | 7 | 10 |  |
| Hypertension |  |  | 1 |
| No | 10 | 9 |  |
| Yes | 3 | 4 |  |
| Hyperlipidemia |  |  | 0.688 |
| No | 6 | 4 |  |
| Yes | 7 | 9 |  |
| Hyperuricemia |  |  | 0.238 |
| No | 5 | 9 |  |
| Yes | 8 | 4 |  |
| Fatty Liver |  |  | 1 |
| No | 7 | 6 |  |
| Yes | 6 | 7 |  |

| Supplementary table 2. Inflammatory response-related genes | | | |
| --- | --- | --- | --- |
| ABCA1 | CYBB | IRF7 | PTGER2 |
| ABI1 | DCBLD2 | ITGA5 | PTGER4 |
| ACVR1B | EBI3 | ITGB3 | PTGIR |
| ACVR2A | EDN1 | ITGB8 | PTPRE |
| ADM | EIF2AK2 | KCNA3 | PVR |
| ADORA2B | EMP3 | KCNJ2 | RAF1 |
| ADRM1 | ADGRE1 | KCNMB2 | RASGRP1 |
| AHR | EREG | KIF1B | RELA |
| APLNR | F3 | KLF6 | RGS1 |
| AQP9 | FFAR2 | LAMP3 | RGS16 |
| ATP2A2 | FPR1 | LCK | RHOG |
| ATP2B1 | FZD5 | LCP2 | RIPK2 |
| ATP2C1 | GABBR1 | LDLR | RNF144B |
| AXL | GCH1 | LIF | ROS1 |
| BDKRB1 | GNA15 | LPAR1 | RTP4 |
| BEST1 | GNAI3 | LTA | SCARF1 |
| BST2 | GP1BA | LY6E | SCN1B |
| BTG2 | GPC3 | LYN | SELE |
| C3AR1 | GPR132 | MARCO | SELL |
| C5AR1 | GPR183 | MEFV | SELENOS |
| CALCRL | HAS2 | MEP1A | SEMA4D |
| CCL17 | HBEGF | MET | SERPINE1 |
| CCL2 | HIF1A | MMP14 | SGMS2 |
| CCL20 | HPN | MSR1 | SLAMF1 |
| CCL22 | HRH1 | MXD1 | SLC11A2 |
| CCL24 | ICAM1 | MYC | SLC1A2 |
| CCL5 | ICAM4 | NAMPT | SLC28A2 |
| CCL7 | ICOSLG | NDP | SLC31A1 |
| CCR7 | IFITM1 | NFKB1 | SLC31A2 |
| CCRL2 | IFNAR1 | NFKBIA | SLC4A4 |
| CD14 | IFNGR2 | NLRP3 | SLC7A1 |
| CD40 | IL10 | NMI | SLC7A2 |
| CD48 | IL10RA | NMUR1 | SPHK1 |
| CD55 | IL12B | NOD2 | SRI |
| CD69 | IL15 | NPFFR2 | STAB1 |
| CD70 | IL15RA | OLR1 | TACR1 |
| CD82 | IL18 | OPRK1 | TACR3 |
| CDKN1A | IL18R1 | OSM | TAPBP |
| CHST2 | IL18RAP | OSMR | TIMP1 |
| CLEC5A | IL1A | P2RX4 | TLR1 |
| CMKLR1 | IL1B | P2RX7 | TLR2 |
| CSF1 | IL1R1 | P2RY2 | TLR3 |
| CSF3 | IL2RB | PCDH7 | TNFAIP6 |
| CSF3R | IL4R | PDE4B | TNFRSF1B |
| CX3CL1 | IL6 | PDPN | TNFRSF9 |
| CXCL10 | IL7R | PIK3R5 | TNFSF10 |
| CXCL11 | CXCL8 | PLAUR | TNFSF15 |
| CXCL6 | INHBA | PROK2 | TNFSF9 |
| CXCL9 | IRAK2 | PSEN1 | TPBG |
| CXCR6 | IRF1 | PTAFR | VIP |

| Supplementary table 3. 195 overlapping genes between the methylation-related genes and inflammatory response-related genes | | | |
| --- | --- | --- | --- |
| ABCA1 | CXCL9 | ITGB3 | PTPRE |
| ABI1 | CXCR6 | ITGB8 | PVR |
| ACVR1B | DCBLD2 | KCNA3 | RAF1 |
| ACVR2A | EBI3 | KCNJ2 | RASGRP1 |
| ADGRE1 | EDN1 | KCNMB2 | RELA |
| ADM | EIF2AK2 | KIF1B | RGS1 |
| ADORA2B | EMP3 | KLF6 | RGS16 |
| ADRM1 | EREG | LAMP3 | RHOG |
| AHR | F3 | LCK | RIPK2 |
| APLNR | FFAR2 | LCP2 | RNF144B |
| AQP9 | FPR1 | LDLR | ROS1 |
| ATP2A2 | FZD5 | LIF | RTP4 |
| ATP2B1 | GABBR1 | LPAR1 | SCARF1 |
| ATP2C1 | GCH1 | LTA | SCN1B |
| AXL | GNA15 | LY6E | SELE |
| BDKRB1 | GNAI3 | LYN | SELL |
| BEST1 | GP1BA | MARCO | SEMA4D |
| BST2 | GPR132 | MEFV | SERPINE1 |
| BTG2 | GPR183 | MEP1A | SGMS2 |
| C3AR1 | HAS2 | MET | SLAMF1 |
| C5AR1 | HBEGF | MMP14 | SLC11A2 |
| CALCRL | HIF1A | MSR1 | SLC1A2 |
| CCL17 | HPN | MXD1 | SLC28A2 |
| CCL2 | HRH1 | MYC | SLC31A1 |
| CCL20 | ICAM1 | NAMPT | SLC31A2 |
| CCL22 | ICAM4 | NFKB1 | SLC4A4 |
| CCL24 | ICOSLG | NFKBIA | SLC7A1 |
| CCL5 | IFITM1 | NLRP3 | SLC7A2 |
| CCL7 | IFNAR1 | NMI | SPHK1 |
| CCR7 | IFNGR2 | NMUR1 | SRI |
| CCRL2 | IL10 | NOD2 | STAB1 |
| CD14 | IL10RA | NPFFR2 | TACR1 |
| CD40 | IL12B | OLR1 | TACR3 |
| CD48 | IL15 | OPRK1 | TAPBP |
| CD55 | IL15RA | OSM | TLR1 |
| CD69 | IL18 | OSMR | TLR2 |
| CD70 | IL18R1 | P2RX4 | TLR3 |
| CD82 | IL18RAP | P2RX7 | TNFAIP6 |
| CDKN1A | IL1A | P2RY2 | TNFRSF1B |
| CHST2 | IL1B | PCDH7 | TNFRSF9 |
| CLEC5A | IL1R1 | PDE4B | TNFSF10 |
| CMKLR1 | IL2RB | PDPN | TNFSF15 |
| CSF1 | IL4R | PIK3R5 | TNFSF9 |
| CSF3 | IL6 | PLAUR | TPBG |
| CSF3R | IL7R | PROK2 | VIP |
| CX3CL1 | INHBA | PSEN1 |  |
| CXCL10 | IRAK2 | PTAFR |  |
| CXCL11 | IRF1 | PTGER2 |  |
| CXCL6 | IRF7 | PTGER4 |  |
| CXCL8 | ITGA5 | PTGIR |  |

| Supplementary table 4. 4974 inflammatory response-related methylation sites | | | | | | | | | |
| --- | --- | --- | --- | --- | --- | --- | --- | --- | --- |
| cg03610073 | cg03208951 | cg18746357 | cg05868473 | cg10236264 | cg24172774 | cg02778694 | cg13537578 | cg04643098 | cg26104475 |
| cg26534425 | cg07374695 | cg04538261 | cg18954525 | cg21806273 | cg09317928 | cg10889133 | cg08644463 | cg22799510 | cg04987335 |
| cg02932854 | cg11285029 | cg01662710 | cg24544883 | cg23201239 | cg14027957 | cg05887493 | cg00988227 | cg16286735 | cg08623979 |
| cg20523558 | cg18857369 | cg03267419 | cg22881851 | cg22758046 | cg17995054 | cg21187142 | cg16271663 | cg16741876 | cg26846864 |
| cg06857300 | cg04193415 | cg18340983 | cg03025248 | cg22599985 | cg18668821 | cg15671845 | cg15959687 | cg09290866 | cg10401078 |
| cg17363540 | cg07824172 | cg01758942 | cg02449202 | cg16084190 | cg22073332 | cg04773066 | cg13853806 | cg25580782 | cg27097923 |
| cg19253850 | cg18907362 | cg21438075 | cg08123738 | cg12037516 | cg13453139 | cg09784259 | cg02871614 | cg17863072 | cg18442793 |
| cg04452432 | cg10667790 | cg00982799 | cg22677556 | cg10569553 | cg18314571 | cg16401111 | cg03947398 | cg18722504 | cg00928799 |
| cg05375210 | cg26131670 | cg24492886 | cg07229800 | cg17963125 | cg09726693 | cg19229441 | cg25682188 | cg22453342 | cg09848191 |
| cg04688292 | cg05630316 | cg00449067 | cg16297928 | cg20199836 | cg00988641 | cg19958057 | cg02630186 | cg12220426 | cg15227791 |
| cg00500176 | cg00796030 | cg20757073 | cg08128650 | cg24251850 | cg12537162 | cg21091547 | cg06248767 | cg16414691 | cg25841380 |
| cg00242629 | cg24575067 | cg19410364 | cg15210817 | cg13089544 | cg00389225 | cg15871766 | cg26773880 | cg04929355 | cg08048809 |
| cg14688905 | cg05627669 | cg08495784 | cg20968821 | cg12406655 | cg21301224 | cg13858266 | cg10709080 | cg27579501 | cg26475085 |
| cg09310092 | cg12382480 | cg19218929 | cg02335517 | cg10806493 | cg06985664 | cg07472953 | cg06979656 | cg19047226 | cg07652350 |
| cg06830319 | cg23486853 | cg12151124 | cg12589538 | cg16234900 | cg13372340 | cg00306510 | cg19071452 | cg21086326 | cg02704552 |
| cg24171152 | cg05424678 | cg02337388 | cg26329192 | cg26442874 | cg05400823 | cg07842062 | cg00264129 | cg03445375 | cg15048534 |
| cg24175498 | cg22277431 | cg00981633 | cg20967869 | cg22232207 | cg06551917 | cg06740667 | cg23908638 | cg26883963 | cg04172533 |
| cg15277018 | cg08894816 | cg01369599 | cg18129961 | cg08415141 | cg15206115 | cg11353706 | cg02510157 | cg10905736 | cg00700394 |
| cg21983354 | cg22580353 | cg20988620 | cg25699727 | cg05835635 | cg13584258 | cg08840010 | cg06896937 | cg24895445 | cg02380641 |
| cg02150126 | cg05395321 | cg18190847 | cg02994124 | cg04219048 | cg09445481 | cg15817945 | cg13430450 | cg13351962 | cg05146293 |
| cg04013750 | cg24425727 | cg13453168 | cg23097499 | cg00143376 | cg11140890 | cg06157072 | cg18350893 | cg18139074 | cg04297507 |
| cg00718036 | cg07844738 | cg01694519 | cg09832948 | cg03460756 | cg01468868 | cg02894527 | cg24289912 | cg22171785 | cg12226228 |
| cg16661654 | cg26433554 | cg17806401 | cg16523044 | cg07634721 | cg22023343 | cg03031526 | cg01975495 | cg04132540 | cg18345506 |
| cg16660677 | cg02904779 | cg06154058 | cg08380252 | cg10718027 | cg16770213 | cg00367390 | cg10862350 | cg06013872 | cg03537150 |
| cg07051746 | cg15584015 | cg00238353 | cg24388852 | cg04724866 | cg08102026 | cg00816096 | cg04799232 | cg21710157 | cg19131731 |
| cg13946313 | cg17219729 | cg02505918 | cg04615964 | cg11823443 | cg16281706 | cg25352189 | cg17198663 | cg20632143 | cg02901679 |
| cg08649765 | cg00164084 | cg22870664 | cg19544434 | cg03099832 | cg01986717 | cg06921992 | cg22892043 | cg24898667 | cg15221994 |
| cg06068935 | cg23027207 | cg02110991 | cg07175966 | cg14326305 | cg25867265 | cg21685770 | cg03346706 | cg15195412 | cg11069855 |
| cg23501962 | cg01974138 | cg15818905 | cg27593778 | cg06350544 | cg10760898 | cg06160606 | cg11061150 | cg03714916 | cg05570415 |
| cg25902146 | cg25475999 | cg08384240 | cg01281904 | cg18492445 | cg11179905 | cg09157176 | cg03388786 | cg08888038 | cg16486109 |
| cg21972222 | cg14010852 | cg04525408 | cg10637499 | cg20961991 | cg25602756 | cg18755094 | cg16591046 | cg05292318 | cg03492094 |
| cg10777481 | cg21221695 | cg08975915 | cg12857064 | cg23363242 | cg20427865 | cg04182076 | cg07232609 | cg03095087 | cg19008097 |
| cg13327929 | cg21583111 | cg05182302 | cg02486161 | cg27457284 | cg11979312 | cg21818891 | cg22966895 | cg19854689 | cg13899486 |
| cg17320269 | cg17218064 | cg01425836 | cg17108430 | cg21957813 | cg01712852 | cg25730577 | cg19695151 | cg08494286 | cg24915233 |
| cg10265502 | cg06571407 | cg03302088 | cg23389408 | cg01189638 | cg12469484 | cg22971501 | cg26083841 | cg01249659 | cg20816757 |
| cg25706683 | cg12477452 | cg05921787 | cg13474090 | cg03871489 | cg15714846 | cg26644853 | cg10860069 | cg20488913 | cg16994200 |
| cg16336960 | cg14262716 | cg10864028 | cg10734940 | cg18554685 | cg03567652 | cg02694974 | cg11593457 | cg07765850 | cg07388018 |
| cg18004110 | cg08992717 | cg25465483 | cg22568703 | cg15791967 | cg10480300 | cg14717659 | cg16932776 | cg04051809 | cg12798017 |
| cg21552290 | cg09409838 | cg05101972 | cg15155441 | cg13293514 | cg08262584 | cg21784237 | cg07742122 | cg01213557 | cg15920390 |
| cg00507414 | cg17554044 | cg11998307 | cg06078334 | cg21080452 | cg06618866 | cg01120307 | cg20128928 | cg23726831 | cg07677850 |
| cg12226735 | cg13859159 | cg07775675 | cg05651442 | cg13938376 | cg23943360 | cg12320306 | cg23311137 | cg08368905 | cg03851598 |
| cg16030593 | cg24606558 | cg05640540 | cg04100971 | cg22633597 | cg25356697 | cg13209878 | cg21861175 | cg18126557 | cg03710251 |
| cg19818353 | cg02863594 | cg26434485 | cg02726729 | cg24470588 | cg14369318 | cg15396949 | cg14992771 | cg04633676 | cg16232444 |
| cg18602829 | cg13504059 | cg13195837 | cg09385815 | cg11800342 | cg14332674 | cg12325510 | cg27077847 | cg12277524 | cg05158854 |
| cg24708332 | cg17381185 | cg24183811 | cg00100361 | cg06218285 | cg16835229 | cg11786988 | cg04258833 | cg20173993 | cg24944109 |
| cg22784898 | cg25666403 | cg17694391 | cg14581949 | cg22360028 | cg07905034 | cg24698488 | cg08711583 | cg23344780 | cg10736330 |
| cg12449821 | cg08100588 | cg00995520 | cg07421119 | cg01046604 | cg20319084 | cg00806253 | cg14426421 | cg24287110 | cg18060391 |
| cg03540344 | cg17185639 | cg08614871 | cg00360107 | cg17020524 | cg04119852 | cg19245381 | cg03833908 | cg26272069 | cg21971818 |
| cg19667833 | cg06860015 | cg04214287 | cg19880149 | cg24328079 | cg00567854 | cg15474579 | cg01795122 | cg00567043 | cg18014042 |
| cg24774306 | cg16127415 | cg03623277 | cg15836722 | cg00582320 | cg19688761 | cg02154635 | cg01971264 | cg26521562 | cg22044018 |
| cg21645752 | cg04996472 | cg19744498 | cg12304273 | cg15983385 | cg09931511 | cg12246177 | cg04016443 | cg25769852 | cg24140421 |
| cg01162463 | cg01451920 | cg22733910 | cg10685380 | cg00255919 | cg18231005 | cg01330998 | cg21441575 | cg12214787 | cg02161417 |
| cg19891586 | cg06874063 | cg05663971 | cg11124980 | cg12742764 | cg01158456 | cg14174912 | cg12434312 | cg01904145 | cg13534901 |
| cg16834953 | cg03584886 | cg24274865 | cg03512248 | cg01863290 | cg09950966 | cg09090549 | cg25663524 | cg03866569 | cg23222243 |
| cg08792988 | cg15299606 | cg20815701 | cg23137343 | cg13255035 | cg04025088 | cg20998791 | cg10861751 | cg06872047 | cg00645579 |
| cg12029630 | cg03138091 | cg02508743 | cg17027262 | cg27578275 | cg11499699 | cg11215644 | cg10902514 | cg08411235 | cg11671947 |
| cg13964104 | cg14961841 | cg07942182 | cg23283432 | cg07072594 | cg24430207 | cg19270050 | cg17315219 | cg05931439 | cg20980592 |
| cg18264745 | cg16601813 | cg26479059 | cg22549797 | cg26701826 | cg08718293 | cg08185576 | cg07991704 | cg22927613 | cg07935264 |
| cg15053915 | cg02705708 | cg10426062 | cg01942558 | cg06722396 | cg15633981 | cg13421412 | cg18622950 | cg12244552 | cg14670793 |
| cg18881380 | cg17580614 | cg04136193 | cg04263186 | cg05447483 | cg24097258 | cg11304234 | cg09658958 | cg13995010 | cg23057597 |
| cg13104454 | cg10042319 | cg05265596 | cg12570716 | cg03017946 | cg10022788 | cg16117781 | cg13833040 | cg08980986 | cg22091322 |
| cg04828902 | cg00891184 | cg04962756 | cg17033047 | cg07978005 | cg01290568 | cg02218381 | cg18656132 | cg09603409 | cg19758087 |
| cg22733626 | cg26292058 | cg02586212 | cg11822964 | cg21832537 | cg05292788 | cg07758482 | cg02936263 | cg25591868 | cg26382286 |
| cg08119594 | cg14935995 | cg05385737 | cg05955210 | cg25614094 | cg10120178 | cg03548857 | cg20572374 | cg16676159 | cg19513593 |
| cg14414203 | cg17742099 | cg06020978 | cg17744604 | cg04321197 | cg03167978 | cg13676816 | cg15621651 | cg16460342 | cg23898555 |
| cg13378284 | cg01683757 | cg13045881 | cg11279454 | cg11612052 | cg16311827 | cg16217803 | cg02526950 | cg03004597 | cg20183585 |
| cg09607525 | cg11025609 | cg16306964 | cg20689294 | cg01396723 | cg09138133 | cg06858852 | cg21042001 | cg23525112 | cg09732307 |
| cg12622515 | cg14081262 | cg23214985 | cg06101750 | cg11901510 | cg15242223 | cg11702866 | cg24016995 | cg18216571 | cg10753610 |
| cg24247923 | cg14359680 | cg04527220 | cg04673961 | cg16389578 | cg08358800 | cg14796679 | cg03566269 | cg06166915 | cg15613153 |
| cg20138067 | cg02797271 | cg27340480 | cg00736915 | cg09773537 | cg08490555 | cg27030540 | cg20333292 | cg14429427 | cg12419482 |
| cg08483713 | cg20180051 | cg00496504 | cg20872692 | cg13774640 | cg06457736 | cg17864156 | cg19023876 | cg20157753 | cg17132910 |
| cg20795635 | cg22328249 | cg18575328 | cg22706334 | cg16291962 | cg02995493 | cg12420398 | cg23864202 | cg11621808 | cg10338830 |
| cg12121075 | cg20773815 | cg05551003 | cg24637364 | cg00233079 | cg15222419 | cg04235495 | cg14655553 | cg00758854 | cg18324215 |
| cg16655388 | cg13593758 | cg11481460 | cg10078570 | cg20119505 | cg24469013 | cg02149446 | cg19799762 | cg02544380 | cg15276500 |
| cg21858700 | cg16019620 | cg00437441 | cg18166144 | cg11801676 | cg27437585 | cg15154411 | cg06977852 | cg05161016 | cg19793620 |
| cg04441796 | cg17394978 | cg11067146 | cg17067993 | cg01771885 | cg25341560 | cg26072958 | cg18135181 | cg24632597 | cg22996023 |
| cg12866229 | cg15194212 | cg13480043 | cg06357908 | cg27151527 | cg27077673 | cg18652319 | cg21234471 | cg07103639 | cg06357321 |
| cg14974397 | cg25437807 | cg10791260 | cg14433987 | cg01955533 | cg12422178 | cg03190911 | cg12111808 | cg15204734 | cg19978381 |
| cg25476136 | cg21049840 | cg20239639 | cg22882684 | cg10980055 | cg20704972 | cg01599770 | cg17172595 | cg07903677 | cg19828516 |
| cg01025398 | cg18538958 | cg25993867 | cg15180656 | cg13192318 | cg16998787 | cg01253676 | cg22572614 | cg25739715 | cg02850252 |
| cg27092248 | cg23625628 | cg04178574 | cg20170309 | cg06603374 | cg18359575 | cg25775493 | cg11796996 | cg17315454 | cg07435592 |
| cg19678259 | cg10467217 | cg08600395 | cg19524534 | cg16524792 | cg05468843 | cg21572986 | cg25328384 | cg07493436 | cg02194398 |
| cg25990647 | cg11564392 | cg05388963 | cg08698135 | cg15643796 | cg24216966 | cg12974545 | cg05769558 | cg03483626 | cg00017461 |
| cg20909017 | cg10033913 | cg13617355 | cg04484658 | cg09022581 | cg11760099 | cg18293833 | cg15703690 | cg25106914 | cg13248890 |
| cg04916406 | cg11202584 | cg06585141 | cg08645201 | cg10202206 | cg20716515 | cg26335014 | cg21002317 | cg08540958 | cg05060607 |
| cg03430998 | cg13747967 | cg17944368 | cg11712187 | cg16084416 | cg19755069 | cg19665390 | cg13730379 | cg12698626 | cg23816620 |
| cg20382184 | cg11701471 | cg26849535 | cg22697359 | cg21597394 | cg17934165 | cg17140224 | cg06559789 | cg15448445 | cg09063388 |
| cg23239812 | cg10528989 | cg07835141 | cg14081694 | cg14167761 | cg27495982 | cg05266437 | cg26247646 | cg10083178 | cg18785500 |
| cg17021598 | cg07479709 | cg04842828 | cg03603381 | cg10743104 | cg20742009 | cg07354583 | cg20718724 | cg13725148 | cg07605143 |
| cg13311890 | cg12203957 | cg17660833 | cg22264409 | cg11072638 | cg14519350 | cg21387009 | cg08526705 | cg08306178 | cg19617570 |
| cg20169766 | cg20032523 | cg24090369 | cg22892489 | cg10994944 | cg03185919 | cg13032616 | cg26674715 | cg18353226 | cg13571501 |
| cg15174246 | cg03406583 | cg08945064 | cg17382214 | cg03062717 | cg11399195 | cg04566018 | cg25094008 | cg21104999 | cg18877506 |
| cg25211289 | cg02375178 | cg13140773 | cg16132315 | cg06230948 | cg02014853 | cg16895026 | cg08862148 | cg22670329 | cg16806536 |
| cg07464291 | cg23243355 | cg04808798 | cg13311440 | cg02786378 | cg13745129 | cg25750408 | cg19099935 | cg16219283 | cg07333921 |
| cg03533123 | cg06933965 | cg03293735 | cg07906351 | cg05385100 | cg22069247 | cg17067005 | cg09444657 | cg09492975 | cg26539024 |
| cg14632793 | cg27020028 | cg13404814 | cg23573995 | cg04973669 | cg20908614 | cg14749678 | cg26176717 | cg19066171 | cg15811427 |
| cg02597698 | cg15659943 | cg11009736 | cg10805721 | cg02506284 | cg04099632 | cg09931680 | cg13530673 | cg04941721 | cg16286142 |
| cg11876263 | cg26795639 | cg06121226 | cg12597521 | cg26255831 | cg20969225 | cg22378085 | cg22850788 | cg09842161 | cg03157750 |
| cg14024810 | cg11367652 | cg15725542 | cg25546588 | cg01574741 | cg26606184 | cg18611847 | cg09643054 | cg09727050 | cg07719773 |
| cg02119982 | cg27635422 | cg21843573 | cg17781892 | cg12046882 | cg21035262 | cg01966117 | cg04905070 | cg02960016 | cg11577097 |
| cg24544803 | cg04388983 | cg02517299 | cg00410483 | cg01109135 | cg19905454 | cg17813548 | cg16750801 | cg07144360 | cg08150575 |
| cg23045908 | cg25166437 | cg26137432 | cg02054375 | cg10971669 | cg11918910 | cg13882486 | cg09225840 | cg09770385 | cg00841436 |
| cg11354609 | cg19417940 | cg21570435 | cg05851333 | cg16119835 | cg11586857 | cg02016764 | cg15003482 | cg06979961 | cg22712861 |
| cg11036913 | cg21108085 | cg17943173 | cg11802797 | cg12697789 | cg00094412 | cg17596097 | cg03659680 | cg23878255 | cg02318988 |
| cg03517466 | cg11619069 | cg01059398 | cg24667042 | cg00219833 | cg19734536 | cg07923363 | cg06171684 | cg27039034 | cg03637976 |
| cg25729445 | cg17633724 | cg20348647 | cg19371286 | cg11511680 | cg17198587 | cg19964325 | cg21743867 | cg08359431 | cg13890519 |
| cg18481222 | cg14659840 | cg05034363 | cg13267324 | cg06926741 | cg21625464 | cg22436123 | cg05149386 | cg01907094 | cg06934410 |
| cg02676052 | cg09987562 | cg05539509 | cg16047279 | cg03941746 | cg25810695 | cg06721806 | cg22838003 | cg05874822 | cg27071460 |
| cg15679532 | cg20854791 | cg24101643 | cg25526759 | cg02402436 | cg26734957 | cg24707189 | cg01668126 | cg14614416 | cg21999229 |
| cg23656957 | cg24530225 | cg00389463 | cg17066933 | cg17887117 | cg18021716 | cg27126090 | cg04350046 | cg12683944 | cg26117398 |
| cg08109333 | cg12786601 | cg19957162 | cg02190383 | cg13131771 | cg11020360 | cg16901027 | cg04706667 | cg15599832 | cg05146527 |
| cg25695615 | cg02449561 | cg06954368 | cg04321753 | cg02219071 | cg17254929 | cg26757673 | cg04250732 | cg08831077 | cg17630144 |
| cg26862175 | cg04432267 | cg14003984 | cg17372026 | cg16491617 | cg13256645 | cg07313373 | cg22085389 | cg00108440 | cg20943084 |
| cg12162778 | cg11079619 | cg22486352 | cg12585342 | cg22098375 | cg05175803 | cg24344000 | cg05102281 | cg05285473 | cg11855354 |
| cg23635663 | cg24484219 | cg21819468 | cg04432493 | cg25503542 | cg16277479 | cg11313080 | cg01439408 | cg18432099 | cg16267455 |
| cg08621168 | cg15456821 | cg08751913 | cg18761349 | cg14019050 | cg18403578 | cg25222848 | cg14081456 | cg08259810 | cg22212414 |
| cg12257233 | cg14892768 | cg06720456 | cg14352951 | cg17127769 | cg15705563 | cg04697162 | cg17545002 | cg14481832 | cg07673212 |
| cg05617790 | cg25677394 | cg10638604 | cg24267752 | cg13419330 | cg08093277 | cg17310228 | cg24856456 | cg09891935 | cg22681777 |
| cg06538238 | cg12179658 | cg07489906 | cg04453552 | cg20545451 | cg23654093 | cg15966006 | cg05012825 | cg07983767 | cg06878802 |
| cg02596281 | cg18356276 | cg04416750 | cg09736959 | cg01297639 | cg11048518 | cg21521892 | cg05396897 | cg26976693 | cg06048750 |
| cg27625552 | cg13060642 | cg05368283 | cg03052784 | cg22977420 | cg21175585 | cg00272070 | cg09039672 | cg24727122 | cg03340398 |
| cg23632791 | cg15929078 | cg20440618 | cg19653967 | cg12405098 | cg12925682 | cg18701707 | cg19930243 | cg15622556 | cg24397241 |
| cg01592588 | cg07421287 | cg12325691 | cg07654579 | cg03554028 | cg18833386 | cg11893004 | cg22516651 | cg26963271 | cg14065382 |
| cg01325448 | cg22217463 | cg14068228 | cg12710152 | cg07301303 | cg20933651 | cg23801057 | cg25358289 | cg01798157 | cg10234998 |
| cg21494776 | cg24270157 | cg03584378 | cg05787507 | cg11891322 | cg15570508 | cg00232201 | cg11683242 | cg15264404 | cg09519060 |
| cg19370952 | cg03903882 | cg03812679 | cg16161871 | cg16012589 | cg10599444 | cg02183960 | cg08248202 | cg01505016 | cg10445545 |
| cg00100963 | cg26482939 | cg08074000 | cg07292161 | cg03754807 | cg19864627 | cg16699281 | cg11000521 | cg10127227 | cg24865779 |
| cg22462582 | cg05608389 | cg08385422 | cg15146813 | cg11532578 | cg24080199 | cg05130541 | cg20817150 | cg19874421 | cg14993276 |
| cg12257178 | cg01011118 | cg15108521 | cg19722814 | cg25262999 | cg27423177 | cg12867320 | cg23598325 | cg10534455 | cg08992565 |
| cg08321366 | cg02060639 | cg05403555 | cg18900812 | cg27352765 | cg01740660 | cg22336004 | cg14995475 | cg20643070 | cg07651906 |
| cg07563400 | cg01067390 | cg15026743 | cg24197567 | cg12228707 | cg10418289 | cg08577553 | cg20405620 | cg14489570 | cg16287734 |
| cg11866943 | cg23241141 | cg00641052 | cg00623727 | cg20214404 | cg13588922 | cg11098259 | cg13936947 | cg27112146 | cg15526535 |
| cg22539632 | cg23708673 | cg24154340 | cg24291087 | cg19027710 | cg01700248 | cg25309767 | cg06180821 | cg05244204 | cg16219720 |
| cg15931030 | cg14910524 | cg08241494 | cg13030981 | cg26514492 | cg13790717 | cg09258150 | cg16513984 | cg05389335 | cg21280745 |
| cg11314531 | cg19853494 | cg21198745 | cg27469991 | cg14148441 | cg25405244 | cg01674623 | cg00110769 | cg26016755 | cg24058805 |
| cg27005259 | cg06956444 | cg05115679 | cg11971752 | cg24652786 | cg00476986 | cg23516451 | cg22488256 | cg00534550 | cg01525376 |
| cg17432459 | cg07676328 | cg08450017 | cg01052743 | cg07022241 | cg09655482 | cg11396585 | cg11001059 | cg19305903 | cg08110272 |
| cg13857915 | cg04970434 | cg25830243 | cg25419384 | cg18475039 | cg05867050 | cg05090699 | cg22808547 | cg22181437 | cg15468964 |
| cg21934015 | cg20580088 | cg18414493 | cg05512303 | cg20583316 | cg03316098 | cg05244974 | cg16622616 | cg18315963 | cg03722052 |
| cg06795340 | cg04262238 | cg04455646 | cg09703963 | cg00660737 | cg05006892 | cg10978799 | cg16392768 | cg11574793 | cg15233681 |
| cg09621572 | cg16980707 | cg14117934 | cg24003508 | cg11227872 | cg22789605 | cg06375761 | cg14537179 | cg00046625 | cg21712538 |
| cg15736360 | cg25963980 | cg20730067 | cg11666365 | cg17992670 | cg05929599 | cg14538146 | cg13815684 | cg01599709 | cg05327736 |
| cg09790702 | cg16461251 | cg27548323 | cg11702942 | cg01740282 | cg10250177 | cg19408145 | cg17169196 | cg09408588 | cg19042062 |
| cg23590216 | cg08031728 | cg18835576 | cg09776113 | cg24081612 | cg26306638 | cg20330447 | cg27610672 | cg03442467 | cg02759144 |
| cg20322837 | cg11588077 | cg07370751 | cg11342332 | cg21482635 | cg01907726 | cg19669107 | cg27361520 | cg07531831 | cg06808751 |
| cg04049819 | cg19018155 | cg07248223 | cg11616676 | cg06816239 | cg02405813 | cg10331829 | cg20629735 | cg04689867 | cg18060742 |
| cg15096505 | cg19163049 | cg18923721 | cg01100208 | cg08008254 | cg06290910 | cg18091848 | cg05261686 | cg14863387 | cg09020665 |
| cg26326208 | cg03938978 | cg03907016 | cg23855752 | cg13365252 | cg17078393 | cg22603971 | cg22697239 | cg06660523 | cg15122111 |
| cg00860712 | cg17085250 | cg17375798 | cg04140974 | cg13230009 | cg17617168 | cg24715061 | cg09316306 | cg05706061 | cg26059670 |
| cg00533825 | cg11860203 | cg11982292 | cg27478060 | cg06738602 | cg20997792 | cg23733146 | cg25726128 | cg07001450 | cg10856034 |
| cg06910119 | cg23362824 | cg14746605 | cg22799033 | cg15382236 | cg02823293 | cg27619385 | cg09917274 | cg18156583 | cg03054153 |
| cg01224554 | cg00192969 | cg27603711 | cg02833872 | cg16647139 | cg02238943 | cg00508575 | cg05440824 | cg17930583 | cg11577454 |
| cg06360505 | cg08957360 | cg23087130 | cg16565952 | cg26913833 | cg12636971 | cg06740893 | cg05700681 | cg25570278 | cg18124517 |
| cg17709873 | cg23026595 | cg03816828 | cg03164561 | cg01508380 | cg17511195 | cg26058544 | cg00708486 | cg13436177 | cg16131748 |
| cg26074088 | cg01412469 | cg03247049 | cg00578078 | cg02184042 | cg23389013 | cg09416109 | cg02390103 | cg15039365 | cg12143439 |
| cg09549015 | cg26333902 | cg13966752 | cg23716690 | cg01199321 | cg12842511 | cg25226014 | cg04234132 | cg09161579 | cg16773907 |
| cg13145193 | cg00875511 | cg23350385 | cg09085358 | cg05200628 | cg10774974 | cg21039208 | cg09410243 | cg13094752 | cg00816475 |
| cg08352261 | cg25604246 | cg10686550 | cg11219547 | cg06672753 | cg18860567 | cg09887627 | cg09754083 | cg06881898 | cg05950791 |
| cg13441983 | cg00295308 | cg18527651 | cg03063365 | cg03366884 | cg25163297 | cg19854061 | cg04156900 | cg07622001 | cg00789037 |
| cg13256912 | cg09324712 | cg03095453 | cg26726490 | cg26856575 | cg02678571 | cg14392283 | cg05615449 | cg13918228 | cg25384507 |
| cg26867774 | cg17532766 | cg14054283 | cg18366651 | cg22875875 | cg12631406 | cg13169863 | cg26033710 | cg00051371 | cg20213613 |
| cg09164835 | cg21115864 | cg13007324 | cg23207054 | cg23305046 | cg07744273 | cg04989278 | cg07510085 | cg14398353 | cg11558856 |
| cg01214376 | cg00285363 | cg00920130 | cg06420764 | cg21531873 | cg15481638 | cg13624385 | cg00066816 | cg19942256 | cg05410102 |
| cg18580929 | cg00367135 | cg15851014 | cg02448735 | cg05594182 | cg26556684 | cg05390356 | cg20434905 | cg15732149 | cg22143324 |
| cg05727605 | cg16700758 | cg24497361 | cg17370595 | cg20388704 | cg14597739 | cg07498879 | cg26399662 | cg15267702 | cg11729107 |
| cg02480696 | cg01548680 | cg25423386 | cg00290637 | cg18545016 | cg05026840 | cg22374415 | cg04995291 | cg15375424 | cg22069688 |
| cg11841529 | cg14855841 | cg15483813 | cg21919599 | cg15001279 | cg10572943 | cg04631897 | cg25739366 | cg22029234 | cg18606426 |
| cg07164606 | cg03095321 | cg14282386 | cg03136563 | cg27490960 | cg10964663 | cg25056456 | cg00976121 | cg11660537 | cg27474149 |
| cg08819120 | cg03243362 | cg08842546 | cg09528351 | cg08218990 | cg07362283 | cg01110222 | cg01555705 | cg21187226 | cg21314480 |
| cg14437551 | cg19092837 | cg24340686 | cg06825627 | cg05590294 | cg13475877 | cg10329173 | cg27004182 | cg06046714 | cg00598766 |
| cg01430566 | cg15205746 | cg07183830 | cg15081929 | cg21428379 | cg09856107 | cg04535008 | cg23884076 | cg06737937 | cg12425768 |
| cg01091117 | cg03639249 | cg14121844 | cg16114654 | cg21100518 | cg10773181 | cg16217610 | cg03826594 | cg08139855 | cg23911777 |
| cg00583551 | cg19539004 | cg10311020 | cg25961618 | cg21138405 | cg18123581 | cg21022830 | cg13727808 | cg05148659 | cg19528789 |
| cg21920303 | cg21460314 | cg05979583 | cg22817659 | cg03406844 | cg14702629 | cg20542313 | cg01517968 | cg20151668 | cg04510495 |
| cg06405222 | cg23055547 | cg07926502 | cg19231290 | cg20029903 | cg08751499 | cg01136261 | cg01532230 | cg02409133 | cg19037167 |
| cg14420245 | cg14707886 | cg14441276 | cg10809828 | cg19492315 | cg21842689 | cg24049949 | cg26908117 | cg23807570 | cg20137425 |
| cg06668495 | cg03625292 | cg10552807 | cg02111587 | cg26675329 | cg00521255 | cg25877869 | cg15636295 | cg27472295 | cg06288054 |
| cg24309944 | cg24064264 | cg16362133 | cg18599081 | cg11386231 | cg02980023 | cg21018887 | cg10954560 | cg05300939 | cg17528648 |
| cg06397011 | cg10034588 | cg01649597 | cg19941370 | cg06517940 | cg25719126 | cg02534417 | cg21542303 | cg16188823 | cg26960939 |
| cg26192328 | cg04937140 | cg27385940 | cg00562089 | cg26348243 | cg03791164 | cg10140148 | cg19574878 | cg01574996 | cg02372334 |
| cg24671344 | cg00594408 | cg22364262 | cg09103978 | cg16592658 | cg17160751 | cg09229210 | cg13254269 | cg02564302 | cg20535085 |
| cg16104076 | cg14865866 | cg03870002 | cg07821160 | cg02020350 | cg02670141 | cg03008693 | cg21481950 | cg14194631 | cg06487289 |
| cg20973878 | cg08424512 | cg07568430 | cg20959872 | cg07917289 | cg19609242 | cg17371749 | cg21287913 | cg06152332 | cg10095242 |
| cg12614504 | cg20862070 | cg23174662 | cg24064392 | cg03874914 | cg15127613 | cg24628013 | cg17236611 | cg03969057 | cg25557835 |
| cg07098946 | cg20943795 | cg08398764 | cg05460965 | cg16736829 | cg23560113 | cg26360766 | cg19751789 | cg08656816 | cg05724197 |
| cg05014952 | cg01590793 | cg23392763 | cg07199562 | cg22216476 | cg10674569 | cg22785136 | cg02077669 | cg08095255 | cg05249393 |
| cg22114548 | cg16521267 | cg10501629 | cg23621797 | cg19890119 | cg19244300 | cg22018660 | cg24298648 | cg20438404 | cg15258711 |
| cg03130199 | cg19425603 | cg07441944 | cg12192566 | cg18792904 | cg19765918 | cg21307484 | cg26787998 | cg04003505 | cg23245952 |
| cg21142984 | cg08826152 | cg24433265 | cg01157951 | cg15780465 | cg05573761 | cg11952948 | cg23584647 | cg12014634 | cg21597025 |
| cg05485663 | cg09123555 | cg15389699 | cg16575444 | cg26613203 | cg03950000 | cg20319867 | cg13302664 | cg12078491 | cg18207699 |
| cg27283993 | cg06697829 | cg03496068 | cg07351688 | cg18956798 | cg22854223 | cg05997362 | cg12864853 | cg18030943 | cg08337166 |
| cg24584094 | cg08122494 | cg24804002 | cg20348618 | cg19104050 | cg16824301 | cg16297948 | cg22146523 | cg11849564 | cg05705212 |
| cg16636837 | cg08317580 | cg26924967 | cg03275864 | cg08614628 | cg16649560 | cg26360533 | cg19937056 | cg00092287 | cg10801752 |
| cg15914589 | cg15696661 | cg25318870 | cg07806979 | cg08115239 | cg17163538 | cg02782805 | cg17540143 | cg01178899 | cg22809983 |
| cg19284751 | cg21424120 | cg01241157 | cg01961881 | cg20368835 | cg07201822 | cg09097404 | cg18546165 | cg24360606 | cg07808555 |
| cg24342146 | cg10298855 | cg09818691 | cg07687574 | cg22318806 | cg00558147 | cg17752270 | cg15010775 | cg16537245 | cg26778877 |
| cg14436272 | cg24430754 | cg01550445 | cg20711051 | cg00796233 | cg20948936 | cg18596381 | cg06391377 | cg24664942 | cg15467577 |
| cg20445035 | cg24765658 | cg03813291 | cg02404720 | cg03548673 | cg02059055 | cg00578828 | cg13744677 | cg01250490 | cg07554474 |
| cg00173178 | cg26083458 | cg25949886 | cg17654257 | cg21599876 | cg10374499 | cg19805434 | cg08895668 | cg11749828 | cg14361320 |
| cg05927173 | cg03433655 | cg08039854 | cg05179645 | cg00558816 | cg01649456 | cg23333994 | cg08214584 | cg26560703 | cg11146039 |
| cg08291302 | cg20806676 | cg23592851 | cg02638791 | cg17136649 | cg12688576 | cg15047198 | cg01165142 | cg11300208 | cg21574681 |
| cg18449135 | cg03755158 | cg04479208 | cg20741987 | cg05350315 | cg17052170 | cg27664018 | cg11846543 | cg21653793 | cg16316416 |
| cg13890326 | cg19759621 | cg22199238 | cg02452203 | cg03188495 | cg06615861 | cg05876984 | cg03599224 | cg08317209 | cg09664479 |
| cg06586602 | cg25628040 | cg03523945 | cg10402804 | cg03601011 | cg02204630 | cg22197824 | cg04822621 | cg10417124 | cg17563620 |
| cg05004518 | cg19825182 | cg22044951 | cg21972977 | cg12823441 | cg05741107 | cg06498520 | cg12940473 | cg24219058 | cg11627346 |
| cg24607283 | cg08222913 | cg06121323 | cg23727674 | cg16952841 | cg27020289 | cg21099811 | cg01962199 | cg11785295 | cg14731462 |
| cg15495146 | cg00378218 | cg25202116 | cg20549250 | cg01645892 | cg01402665 | cg18312118 | cg24799218 | cg09068653 | cg15682985 |
| cg12769828 | cg09256617 | cg19845212 | cg00669289 | cg04774710 | cg03621488 | cg22603854 | cg07183567 | cg03915752 | cg10319664 |
| cg25000012 | cg00831909 | cg16788202 | cg00714198 | cg18862610 | cg16424562 | cg02372201 | cg09550686 | cg05281894 | cg11132443 |
| cg26596307 | cg05645211 | cg23633330 | cg00748903 | cg06259052 | cg15382669 | cg18027476 | cg25894955 | cg04092800 | cg07960944 |
| cg10325497 | cg16556968 | cg25913475 | cg03505654 | cg06302284 | cg24295442 | cg15147215 | cg04935903 | cg06641959 | cg02867514 |
| cg09238196 | cg00274587 | cg16359175 | cg18443210 | cg00501919 | cg24113439 | cg03213236 | cg17571559 | cg08670465 | cg14950298 |
| cg05365735 | cg03819136 | cg26656658 | cg17933917 | cg01199327 | cg03970033 | cg07222908 | cg09303717 | cg27249698 | cg26782135 |
| cg13662417 | cg14733016 | cg00447324 | cg21638071 | cg17478776 | cg17951445 | cg26681354 | cg04049532 | cg06453117 | cg09740379 |
| cg10930528 | cg03450719 | cg23959705 | cg10679147 | cg22162799 | cg04325406 | cg22483191 | cg14650495 | cg26466027 | cg10375456 |
| cg03435439 | cg26901352 | cg07164224 | cg09639735 | cg17786255 | cg18193378 | cg13986215 | cg22994634 | cg00305797 | cg08230059 |
| cg05649684 | cg23149881 | cg14128584 | cg06392753 | cg03906120 | cg27480214 | cg21350115 | cg24904937 | cg18496383 | cg02497486 |
| cg08781710 | cg02181247 | cg13427632 | cg24244437 | cg03591496 | cg03168711 | cg25385468 | cg12411964 | cg10304281 | cg08891882 |
| cg11758840 | cg18296061 | cg12711018 | cg10031849 | cg12322805 | cg00170483 | cg09545197 | cg26079699 | cg07019599 | cg05614059 |
| cg27292389 | cg22371518 | cg24848602 | cg12499372 | cg06148685 | cg04125373 | cg16272710 | cg15341577 | cg17679153 | cg00869668 |
| cg23546062 | cg00646813 | cg00989361 | cg07796897 | cg00864359 | cg10235170 | cg23540139 | cg04614961 | cg06792598 | cg02670082 |
| cg12248981 | cg26128312 | cg26529437 | cg15985891 | cg06115810 | cg16185011 | cg22015527 | cg16862242 | cg08412699 | cg25990848 |
| cg00595030 | cg17316679 | cg17851329 | cg24348573 | cg27587780 | cg08384379 | cg01957786 | cg05106269 | cg07005449 | cg12484135 |
| cg26912671 | cg26269613 | cg00922378 | cg08027810 | cg16391517 | cg16389474 | cg08319866 | cg26998044 | cg22013137 | cg01854882 |
| cg21439297 | cg07955720 | cg13268374 | cg25493658 | cg22065591 | cg06577251 | cg03973663 | cg24506533 | cg07203561 | cg22766191 |
| cg13638257 | cg25051831 | cg03440125 | cg02207457 | cg21532758 | cg18126978 | cg14457599 | cg14544641 | cg03591396 | cg24539234 |
| cg20496034 | cg17108838 | cg09938079 | cg17716037 | cg12915636 | cg16423555 | cg23407561 | cg01671333 | cg05587758 | cg07411449 |
| cg22048546 | cg26125793 | cg10977845 | cg07757163 | cg04038724 | cg10882692 | cg22891191 | cg23585979 | cg11344073 | cg13084345 |
| cg17062546 | cg20868817 | cg13897122 | cg00993674 | cg09017792 | cg09289552 | cg18116160 | cg03330972 | cg09972723 | cg09026253 |
| cg18716706 | cg20424182 | cg13900023 | cg27333178 | cg05616312 | cg26937798 | cg27501265 | cg11203154 | cg01521436 | cg19041132 |
| cg22786770 | cg14431916 | cg08485587 | cg19848291 | cg06920054 | cg22843424 | cg25826546 | cg14175032 | cg15208524 | cg13844463 |
| cg18594663 | cg26245643 | cg15798455 | cg18061847 | cg02415834 | cg09816500 | cg25855585 | cg13799201 | cg26832142 | cg23471482 |
| cg04872448 | cg17850111 | cg20931965 | cg13432451 | cg10497894 | cg12788666 | cg16293923 | cg21431387 | cg04700907 | cg03277377 |
| cg22087450 | cg15218327 | cg01865721 | cg05973028 | cg15582582 | cg07865607 | cg09993699 | cg16363586 | cg01414772 | cg14561295 |
| cg14670922 | cg13264059 | cg06653045 | cg13800130 | cg17804825 | cg27288081 | cg23489504 | cg03291996 | cg15339010 | cg00797651 |
| cg16862063 | cg26143829 | cg26432171 | cg19546781 | cg12290099 | cg06260992 | cg22834109 | cg08056012 | cg13374172 | cg13953976 |
| cg22822919 | cg12071806 | cg13405783 | cg10317164 | cg05997059 | cg09911807 | cg04852685 | cg20608294 | cg17840098 | cg03729431 |
| cg01736477 | cg14781242 | cg22016995 | cg16284789 | cg06969118 | cg06573573 | cg23204070 | cg04433253 | cg23795217 | cg01376221 |
| cg01714160 | cg09122223 | cg06668844 | cg11628370 | cg09458680 | cg25342409 | cg25945303 | cg20136855 | cg24174608 | cg01259359 |
| cg07345708 | cg13038321 | cg13623108 | cg14164032 | cg27433414 | cg00476948 | cg00483888 | cg17832009 | cg01373473 | cg12280471 |
| cg17291383 | cg09513023 | cg22867729 | cg11528914 | cg01329005 | cg24678429 | cg07526803 | cg05286874 | cg03919650 | cg10044466 |
| cg21820436 | cg11340260 | cg08298591 | cg18070470 | cg07571745 | cg17015506 | cg25936841 | cg14419102 | cg17946161 | cg06770435 |
| cg26229618 | cg27130049 | cg11499236 | cg24072600 | cg20432854 | cg00919002 | cg10651168 | cg25941598 | cg25579356 | cg13509638 |
| cg19543355 | cg04916523 | cg19275050 | cg24944820 | cg10564498 | cg06694132 | cg01040375 | cg10631304 | cg06610263 | cg13173405 |
| cg22043586 | cg19305227 | cg25989719 | cg23128263 | cg06362482 | cg20196790 | cg20584801 | cg11453792 | cg11273820 | cg08630639 |
| cg06880721 | cg02691407 | cg19958586 | cg27196954 | cg11143091 | cg13132027 | cg02191909 | cg27297993 | cg02843237 | cg04009117 |
| cg03055671 | cg08237608 | cg20801163 | cg09320652 | cg16180217 | cg25749254 | cg08979284 | cg08333580 | cg07955881 | cg26050022 |
| cg07454481 | cg16134491 | cg10192360 | cg17868320 | cg24342464 | cg01520122 | cg19850333 | cg16756986 | cg09672233 | cg16873920 |
| cg01660591 | cg10464926 | cg02806289 | cg15721571 | cg05515792 | cg10007189 | cg16918989 | cg08713913 | cg02783734 | cg12550229 |
| cg03453574 | cg13676215 | cg24691196 | cg07504352 | cg13124788 | cg10018254 | cg10545482 | cg25573580 | cg17134792 | cg11275039 |
| cg24781804 | cg16417771 | cg10676612 | cg20060523 | cg07237926 | cg10984084 | cg03260732 | cg26581200 | cg24216535 | cg22006489 |
| cg17691657 | cg09671325 | cg05873827 | cg14689355 | cg15407570 | cg13263285 | cg15621697 | cg16045612 | cg04066626 | cg16148956 |
| cg23004710 | cg05002590 | cg12991385 | cg15509148 | cg04489803 | cg16771652 | cg07998387 | cg02030115 | cg21643045 | cg09750646 |
| cg09214535 | cg02927136 | cg16247264 | cg04499514 | cg09677820 | cg00331677 | cg04105342 | cg25832824 | cg24055461 | cg09859437 |
| cg19077400 | cg24104249 | cg26592283 | cg13259118 | cg20891443 | cg01243823 | cg11117097 | cg18673825 | cg17154054 | cg13938341 |
| cg05213722 | cg27516302 | cg18080470 | cg04503267 | cg06827361 | cg22948275 | cg24682307 | cg22549437 | cg15395560 | cg05890620 |
| cg17053201 | cg23501567 | cg10837783 | cg05807305 | cg15135914 | cg27266396 | cg09615760 | cg08130663 | cg18881723 | cg12447051 |
| cg20360212 | cg06160019 | cg05667472 | cg22679406 | cg14413862 | cg15418499 | cg17657615 | cg08380127 | cg03381747 | cg17024542 |
| cg25150799 | cg18835300 | cg05567468 | cg17958447 | cg16547110 | cg08217159 | cg25974459 | cg13224075 | cg02285217 | cg15011209 |
| cg10763547 | cg18668284 | cg17000067 | cg12840245 | cg00840438 | cg07843142 | cg15413738 | cg08216584 | cg25560924 | cg24962941 |
| cg26284484 | cg00175579 | cg17148205 | cg26718763 | cg05936004 | cg23470139 | cg02290360 | cg16830944 | cg04155148 | cg07892449 |
| cg17193808 | cg26546537 | cg19825186 | cg01068906 | cg00074348 | cg13439595 | cg11289296 | cg20643039 | cg14151199 | cg16910896 |
| cg16486653 | cg15054260 | cg11418177 | cg12076358 | cg01653005 | cg00559179 | cg24925313 | cg13406746 | cg15479752 | cg23321228 |
| cg03824868 | cg23187103 | cg02847140 | cg13836323 | cg10411510 | cg09601514 | cg06597861 | cg27094856 | cg19937331 | cg14958663 |
| cg14870229 | cg08932316 | cg08862320 | cg15054753 | cg00187837 | cg00118471 | cg21601405 | cg11904429 | cg26804575 | cg04212111 |
| cg01383128 | cg05117620 | cg27417578 | cg19351350 | cg10145584 | cg21010566 | cg04854568 | cg00163372 | cg25339653 | cg26824216 |
| cg03160788 | cg24426044 | cg18477816 | cg17892601 | cg16330225 | cg08028047 | cg20566897 | cg23810231 | cg26761618 | cg20509117 |
| cg04545963 | cg00188450 | cg18494399 | cg21935595 | cg17779289 | cg17028259 | cg13440544 | cg15750803 | cg16590190 | cg23525051 |
| cg24330955 | cg18075011 | cg23508786 | cg27565517 | cg15198000 | cg00900589 | cg04325963 | cg13925011 | cg03317172 | cg12307014 |
| cg18821742 | cg14859417 | cg17851017 | cg22132386 | cg18468844 | cg11363527 | cg25358853 | cg01423964 | cg27039847 | cg18302652 |
| cg11674933 | cg08899504 | cg23892456 | cg03821474 | cg14388195 | cg01801368 | cg02361306 | cg14378593 | cg15044556 | cg03904840 |
| cg15465092 | cg12170868 | cg18825419 | cg15291905 | cg11753540 | cg00253236 | cg16935060 | cg25080152 | cg07713027 | cg05003685 |
| cg02726377 | cg12185383 | cg02843092 | cg09702113 | cg05008701 | cg20166438 | cg01577980 | cg25758009 | cg26657648 | cg10217657 |
| cg21158795 | cg14103631 | cg03886837 | cg03286235 | cg22263059 | cg10565832 | cg00364287 | cg18672986 | cg12224417 | cg26999833 |
| cg16979252 | cg17212881 | cg04261556 | cg18507129 | cg01085454 | cg25559625 | cg09451413 | cg12161045 | cg02410887 | cg20047483 |
| cg10647214 | cg05302036 | cg00928751 | cg18870456 | cg24162449 | cg07052387 | cg03403662 | cg04312209 | cg23470025 | cg06540636 |
| cg18312356 | cg10042876 | cg03682895 | cg02050165 | cg18810542 | cg09321494 | cg11108893 | cg07376381 | cg04864149 | cg01969473 |
| cg26062141 | cg12485428 | cg25456144 | cg05365092 | cg16294013 | cg10111054 | cg09418290 | cg05018713 | cg03216580 | cg03063857 |
| cg18007850 | cg05971966 | cg05282559 | cg04684486 | cg15060905 | cg01854944 | cg11688275 | cg02419321 | cg04205182 | cg24722365 |
| cg21282997 | cg09684338 | cg22790934 | cg26549174 | cg07550921 | cg17918201 | cg12722469 | cg01616956 | cg11386686 | cg03211132 |
| cg01877260 | cg04196085 | cg05432003 | cg00605127 | cg02290262 | cg00620018 | cg04318196 | cg04084875 | cg04167833 | cg07387634 |
| cg06773921 | cg15559110 | cg25410123 | cg16177076 | cg15373972 | cg05877565 | cg26151158 | cg24640415 | cg16303562 | cg07255371 |
| cg13210566 | cg23774975 | cg07963181 | cg02776148 | cg00149213 | cg24235904 | cg07156876 | cg00966974 | cg14479638 | cg12496411 |
| cg01789267 | cg26364291 | cg15173876 | cg23371584 | cg08861127 | cg09999109 | cg00790535 | cg23461512 | cg00225553 | cg25458727 |
| cg08028335 | cg25072179 | cg04534404 | cg05343713 | cg23735602 | cg26661481 | cg09452256 | cg17168630 | cg23579306 | cg14063654 |
| cg02155647 | cg23694114 | cg12461568 | cg01772760 | cg12048067 | cg06568783 | cg21509123 | cg05540431 | cg06084613 | cg13633756 |
| cg19714940 | cg26574266 | cg14153654 | cg18447962 | cg02184418 | cg08373547 | cg27502066 | cg09500174 | cg16995420 | cg26142490 |
| cg05903710 | cg18635064 | cg10775893 | cg26744084 | cg07800325 | cg10533331 | cg14940444 | cg05465481 | cg22839308 | cg12481893 |
| cg17067544 | cg03408433 | cg12013591 | cg09801924 | cg21570220 | cg07634706 | cg06755741 | cg04782587 | cg08857745 | cg02821694 |
| cg07384001 | cg01604260 | cg09577455 | cg00667298 | cg15696343 | cg21514871 | cg23462257 | cg08003321 | cg22764285 | cg24983383 |
| cg15216232 | cg05409915 | cg00090800 | cg12827852 | cg04369302 | cg18190832 | cg18678599 | cg11791751 | cg07074798 | cg22659014 |
| cg03743858 | cg01770232 | cg15176760 | cg04907571 | cg09740560 | cg01777212 | cg07625129 | cg19805953 | cg05532669 | cg16723678 |
| cg22731812 | cg25893275 | cg04719491 | cg22137641 | cg02345747 | cg06045761 | cg21502048 | cg26501102 | cg14234421 | cg21240855 |
| cg18638065 | cg14586707 | cg18326398 | cg09822488 | cg11110643 | cg13971030 | cg11966313 | cg01162064 | cg16433846 | cg08554257 |
| cg16037611 | cg16234027 | cg04571513 | cg21029297 | cg13906416 | cg02361903 | cg04714188 | cg14338481 | cg08348900 | cg07631359 |
| cg18276145 | cg18591801 | cg03287569 | cg24896692 | cg13349623 | cg20335068 | cg07471962 | cg27529808 | cg12922492 | cg01412300 |
| cg20543603 | cg07725759 | cg09326546 | cg02563827 | cg07358852 | cg19862307 | cg08812936 | cg19388776 | cg13412021 | cg02017041 |
| cg11113392 | cg13663845 | cg01213231 | cg09615786 | cg02343503 | cg17439352 | cg25591996 | cg11543229 | cg02341898 | cg14564724 |
| cg23353570 | cg22043936 | cg22549547 | cg01710351 | cg00545681 | cg19284460 | cg20680674 | cg13616262 | cg19502207 | cg02751829 |
| cg07865573 | cg16437406 | cg03464378 | cg15701237 | cg17452316 | cg22877703 | cg20470528 | cg21810086 | cg21094152 | cg00083704 |
| cg16770799 | cg00034130 | cg22576658 | cg27345516 | cg04898092 | cg19383430 | cg18115436 | cg02450124 | cg25493901 | cg23855063 |
| cg19275895 | cg23749856 | cg09017174 | cg18265435 | cg15584401 | cg15337209 | cg20460771 | cg17922296 | cg20423093 | cg12422968 |
| cg06245656 | cg23913069 | cg24065395 | cg21501163 | cg01254505 | cg10243609 | cg10061138 | cg16856792 | cg15232722 | cg21786775 |
| cg19524972 | cg12031291 | cg05828485 | cg03765062 | cg00701755 | cg14436773 | cg12468377 | cg23447057 | cg26571618 | cg05179921 |
| cg08330117 | cg27656302 | cg00008621 | cg05801992 | cg18622631 | cg08427717 | cg14170426 | cg20850894 | cg05941208 | cg21249659 |
| cg14630985 | cg10445147 | cg11717552 | cg10952220 | cg08269742 | cg11348389 | cg10814856 | cg15563963 | cg10224107 | cg18313221 |
| cg02573340 | cg11267609 | cg26707728 | cg05707844 | cg15292072 | cg11686092 | cg01983105 | cg14126601 | cg12584355 | cg03780905 |
| cg08684663 | cg10277218 | cg08787083 | cg02499923 | cg04932381 | cg00071622 | cg03839929 | cg18656414 | cg08516641 | cg14523574 |
| cg20415643 | cg07684457 | cg23768510 | cg16640633 | cg06266853 | cg17754876 | cg13559409 | cg15208519 | cg13827284 | cg19160353 |
| cg17634045 | cg21640432 | cg12368524 | cg03740216 | cg02240686 | cg00335169 | cg26459951 | cg00689225 | cg05473730 | cg00000884 |
| cg12828294 | cg14616533 | cg00028318 | cg10738142 | cg00622702 | cg13937155 | cg10838357 | cg23317319 | cg24677732 | cg03328727 |
| cg24886176 | cg03498895 | cg09386682 | cg14552744 | cg07156115 | cg09186725 | cg26954174 | cg27107532 | cg27310031 | cg03361304 |
| cg08195491 | cg13878641 | cg05105110 | cg24327461 | cg07169712 | cg06393340 | cg13055288 | cg18470295 | cg09606036 | cg18529569 |
| cg27442676 | cg05118976 | cg15355388 | cg21504945 | cg24354612 | cg11558823 | cg08299080 | cg10275925 | cg09449428 | cg11209001 |
| cg15810615 | cg19807968 | cg21161126 | cg14193886 | cg23132451 | cg06887400 | cg06512249 | cg09666573 | cg18070504 | cg27425755 |
| cg05823465 | cg13988359 | cg13927034 | cg22621745 | cg24062706 | cg03460527 | cg26157264 | cg02319068 | cg26161261 | cg20085920 |
| cg20696806 | cg20732869 | cg11076714 | cg04167054 | cg20287640 | cg07602200 | cg06818377 | cg22705372 | cg20449210 | cg23963855 |
| cg23263923 | cg05604720 | cg25593258 | cg23195101 | cg16424884 | cg01943874 | cg14325851 | cg16887607 | cg25155738 | cg07969095 |
| cg09396517 | cg24923953 | cg04214946 | cg07900328 | cg18676070 | cg21848629 | cg03548744 | cg21402832 | cg07955457 | cg26239391 |
| cg19553158 | cg14187645 | cg25028289 | cg08555612 | cg20964377 | cg23922433 | cg24847163 | cg13132197 | cg15158608 | cg17567125 |
| cg22837791 | cg09160330 | cg04543026 | cg01957088 | cg16030275 | cg13649943 | cg08179530 | cg08772127 | cg17605814 | cg03780271 |
| cg04727116 | cg20642417 | cg25414486 | cg15005072 | cg08124722 | cg21027616 | cg09410234 | cg19315081 | cg05481452 | cg01698108 |
| cg12126781 | cg27335924 | cg06916950 | cg09827629 | cg23087531 | cg08798184 | cg27097248 | cg07714708 | cg13556604 | cg20036207 |
| cg23922718 | cg08792542 | cg08830139 | cg18873403 | cg18797229 | cg23236365 | cg03536202 | cg01550841 | cg15166014 | cg05916671 |
| cg22425913 | cg20710143 | cg15049358 | cg08506775 | cg10729325 | cg20274167 | cg18025409 | cg21433170 | cg02292679 | cg08926253 |
| cg03859906 | cg07399369 | cg21649118 | cg24573480 | cg24539923 | cg02072885 | cg02688760 | cg12005404 | cg08181572 | cg19043207 |
| cg08462879 | cg05645538 | cg19672694 | cg13734832 | cg14396960 | cg23517251 | cg01974715 | cg17591725 | cg13185878 | cg15116327 |
| cg11306068 | cg07540983 | cg13740045 | cg08271632 | cg17503508 | cg05412141 | cg13470291 | cg19463706 | cg24867458 | cg06632214 |
| cg03181117 | cg05624858 | cg06146483 | cg09738391 | cg16688437 | cg16695597 | cg08813545 | cg11939488 | cg12016862 | cg24128202 |
| cg26395055 | cg06875754 | cg08634721 | cg01199950 | cg03361738 | cg04873188 | cg24859012 | cg14705821 | cg08844894 | cg18344922 |
| cg14644787 | cg07962805 | cg18331396 | cg05372370 | cg07919167 | cg11558551 | cg12258176 | cg05670596 | cg24009544 | cg05157370 |
| cg15409712 | cg21712036 | cg05972518 | cg20186817 | cg06111286 | cg00625963 | cg05941292 | cg14092017 | cg26500144 | cg01804183 |
| cg05348321 | cg15132559 | cg09804380 | cg24061914 | cg12335447 | cg02681389 | cg19050161 | cg18220030 | cg10912126 | cg22577197 |
| cg05599723 | cg07199536 | cg18676273 | cg05265849 | cg05607908 | cg08774368 | cg18950940 | cg10395950 | cg03478415 | cg15403346 |
| cg02372142 | cg05987644 | cg12899223 | cg12793812 | cg05105770 | cg16922688 | cg07285167 | cg13119122 | cg02928896 | cg16462793 |
| cg20776107 | cg14313833 | cg03265385 | cg05894948 | cg00467529 | cg08384285 | cg15895543 | cg12142354 | cg17085748 | cg14732699 |
| cg20548977 | cg09516121 | cg03810301 | cg27074367 | cg05021923 | cg25723331 | cg10552523 | cg04806553 | cg09359907 | cg05211986 |
| cg19572362 | cg10874314 | cg03760265 | cg05433448 | cg17228035 | cg16906456 | cg05868023 | cg04616961 | cg27557698 | cg00256278 |
| cg13783518 | cg02934500 | cg06933924 | cg04794804 | cg23942980 | cg23742601 | cg07407658 | cg10699547 | cg01087925 | cg06921943 |
| cg26129418 | cg05700142 | cg25612054 | cg21887246 | cg00986803 | cg24337809 | cg11809085 | cg20560602 | cg03254310 | cg09295300 |
| cg04973751 | cg12740129 | cg02192673 | cg05573264 | cg02928278 | cg16100135 | cg09679897 | cg07943245 | cg17174566 | cg06093460 |
| cg02316283 | cg00546302 | cg18099408 | cg04249754 | cg16331862 | cg05373116 | cg17798847 | cg10609809 | cg20012309 | cg11543559 |
| cg26637069 | cg22212217 | cg16804020 | cg07586725 | cg11562596 | cg01313538 | cg21116673 | cg23696432 | cg11333242 | cg16523097 |
| cg06686058 | cg24778383 | cg03003858 | cg11847468 | cg12402427 | cg11556884 | cg11015660 | cg14967066 | cg27039008 | cg26313301 |
| cg00117156 | cg02933679 | cg00120810 | cg09134747 | cg19538203 | cg26528531 | cg26864526 | cg11497147 | cg18877969 | cg10615271 |
| cg23663547 | cg17114584 | cg18930100 | cg23501468 | cg20146177 | cg11284631 | cg09228785 | cg10778996 | cg01242576 | cg08791234 |
| cg26046204 | cg24027302 | cg10603233 | cg19357999 | cg20054786 | cg24719827 | cg15025089 | cg20557534 | cg14373760 | cg04960880 |
| cg09081517 | cg03107125 | cg07222575 | cg15475412 | cg07776734 | cg25771140 | cg22733664 | cg13644715 | cg01212346 | cg27279020 |
| cg08977266 | cg19859335 | cg02082588 | cg17594164 | cg07526221 | cg21298969 | cg22282590 | cg24738463 | cg18307303 | cg19979643 |
| cg26644764 | cg14458903 | cg10232759 | cg06929186 | cg20873420 | cg11725975 | cg09351156 | cg12552394 | cg10402328 | cg18793688 |
| cg01875418 | cg24005914 | cg20407834 | cg23732781 | cg10886442 | cg22473846 | cg02143350 | cg23693907 | cg21022792 | cg04188234 |
| cg14431850 | cg15694127 | cg09547880 | cg16961961 | cg22416376 | cg11197318 | cg11012837 | cg24736201 | cg03239976 | cg01035238 |
| cg21277851 | cg10345613 | cg27455470 | cg08607082 | cg17113124 | cg17249942 | cg05661333 | cg02857943 | cg08408433 | cg10695623 |
| cg19145607 | cg22798758 | cg14102988 | cg01496416 | cg01735416 | cg14046365 | cg21163960 | cg22464182 | cg07871324 | cg18971819 |
| cg17568518 | cg06013215 | cg08748308 | cg20302133 | cg26013553 | cg14785892 | cg01043320 | cg07160118 | cg08448284 | cg20955701 |
| cg10852165 | cg13455354 | cg11753709 | cg10434274 | cg00087425 | cg21429102 | cg21664037 | cg03527260 | cg16872520 | cg21049965 |
| cg08359236 | cg12332536 | cg25179317 | cg10159951 | cg09805055 | cg04352676 | cg01849284 | cg10201616 | cg01496720 | cg17009165 |
| cg25844276 | cg21149775 | cg18890864 | cg04132713 | cg21432842 | cg18460373 | cg20318353 | cg21166999 | cg02399455 | cg15723028 |
| cg15421363 | cg19298774 | cg20162240 | cg00634258 | cg26944978 | cg04783530 | cg27130965 | cg11848424 | cg05431842 | cg00772686 |
| cg22947804 | cg06111254 | cg10576725 | cg18712806 | cg23878776 | cg08982743 | cg17929951 | cg01455471 | cg07990805 | cg24880057 |
| cg14527942 | cg03533006 | cg06173626 | cg14039343 | cg03446502 | cg20823940 | cg23755461 | cg24022829 | cg14837919 | cg08496872 |
| cg07697735 | cg19022254 | cg12601933 | cg01239708 | cg24635257 | cg21233506 | cg24460640 | cg01996125 | cg07829804 | cg08379828 |
| cg01064307 | cg13827700 | cg01937742 | cg01137708 | cg18183941 | cg13520931 | cg22727297 | cg06252382 | cg14148681 | cg17724366 |
| cg10249098 | cg17798194 | cg04167126 | cg26938302 | cg20966272 | cg00818752 | cg26919154 | cg09970967 | cg15717853 | cg02522061 |
| cg23570810 | cg21572316 | cg03680322 | cg13563882 | cg09216620 | cg24552067 | cg26656113 | cg22431965 | cg03146394 | cg09684929 |
| cg20603557 | cg03464689 | cg08794478 | cg19773385 | cg00849335 | cg08757864 | cg16145913 | cg01569406 | cg00119079 | cg12968518 |
| cg10800280 | cg15385139 | cg13314400 | cg21125629 | cg12315353 | cg16632096 | cg27032569 | cg04172043 | cg06268701 | cg02636177 |
| cg01493105 | cg19303682 | cg01991582 | cg10836034 | cg03851591 | cg20561790 | cg16304438 | cg04769514 | cg16522980 | cg27230009 |
| cg09824255 | cg04080875 | cg06875985 | cg07622342 | cg10634551 | cg16249761 | cg05940536 | cg00478442 | cg12929040 | cg17917518 |
| cg11913416 | cg10340053 | cg15788149 | cg17496096 | cg21406409 | cg02133070 | cg25241889 | cg15867728 | cg16330786 | cg01838317 |
| cg01899130 | cg01453816 | cg02983203 | cg18492803 | cg06097707 | cg10640764 | cg15692457 | cg21603891 | cg15481741 | cg23508438 |
| cg18703581 | cg16442044 | cg07500019 | cg19972619 | cg23452004 | cg06900806 | cg03284642 | cg13836270 | cg01149415 | cg14959425 |
| cg03342114 | cg25773917 | cg09765258 | cg20868410 | cg05920119 | cg20892293 | cg22356117 | cg20119487 | cg26202458 | cg23655858 |
| cg26228282 | cg06782158 | cg25279524 | cg10106965 | cg26731715 | cg08258650 | cg04900856 | cg03937082 | cg27631199 | cg03359337 |
| cg04077047 | cg03118674 | cg01765653 | cg26538214 | cg16527407 | cg01203549 | cg23954416 | cg13965707 | cg13619387 | cg23358661 |
| cg04957663 | cg24412939 | cg15317221 | cg16437134 | cg20263733 | cg25122390 | cg16006514 | cg08757862 | cg13386888 | cg24615528 |
| cg23438137 | cg18258482 | cg02431964 | cg22381454 | cg26048182 | cg25460273 | cg25635805 | cg08894788 | cg09238677 | cg01383840 |
| cg09355232 | cg16205375 | cg09749751 | cg06942904 | cg12173506 | cg11429997 | cg21579828 | cg07986469 | cg08578823 | cg23816142 |
| cg27045396 | cg01466219 | cg26428889 | cg04635671 | cg02150536 | cg11837970 | cg08975998 | cg25611523 | cg08890309 | cg17777977 |
| cg19218072 | cg04489053 | cg07096868 | cg19494100 | cg11834473 | cg05915281 | cg14560889 | cg08141928 | cg23025958 | cg22370082 |
| cg03127104 | cg08315283 | cg06185817 | cg24863347 | cg23306453 | cg05126855 | cg16496571 | cg22934516 | cg21596995 | cg18673401 |
| cg23181493 | cg26800010 | cg27495579 | cg04972775 | cg17782687 | cg09003490 | cg14588411 | cg19572826 | cg17127166 | cg05569169 |
| cg26695125 | cg18825539 | cg25922341 | cg22199335 | cg03199006 | cg20170405 | cg11335172 | cg00759793 | cg17207690 | cg18944786 |
| cg01407419 | cg25286482 | cg06487775 | cg18004316 | cg07043494 | cg04592505 | cg13944870 | cg17751240 | cg25709259 | cg15915632 |
| cg03244181 | cg04754916 | cg03873511 | cg09353832 | cg14888234 | cg05936332 | cg09655952 | cg12851651 | cg03954927 | cg16399300 |
| cg14425722 | cg06744540 | cg26333498 | cg09557991 | cg00305374 | cg02136679 | cg00568555 | cg22321764 | cg01036205 | cg10246774 |
| cg13332222 | cg08290260 | cg05460226 | cg10006956 | cg04235146 | cg07502066 | cg13866577 | cg00321108 | cg07591869 | cg14827929 |
| cg10901569 | cg08507070 | cg05214947 | cg00899463 | cg12531953 | cg14650577 | cg10721979 | cg13248299 | cg20612286 | cg21368462 |
| cg04451259 | cg18841545 | cg05554494 | cg01055364 | cg25299676 | cg04733838 | cg03345714 | cg25757697 | cg26985666 | cg11851603 |
| cg17512624 | cg08173915 | cg11230154 | cg09573645 | cg06772874 | cg26277606 | cg07113947 | cg24936467 | cg15831310 | cg17225717 |
| cg20749730 | cg23873315 | cg09034922 | cg05238522 | cg22379175 | cg20271194 | cg19442495 | cg14244360 | cg15810222 | cg04329510 |
| cg24634422 | cg10302505 | cg20584555 | cg06236835 | cg17095850 | cg12831925 | cg25055867 | cg00940514 | cg23575275 | cg02636834 |
| cg23680451 | cg15236149 | cg12764170 | cg24102749 | cg02536253 | cg16955074 | cg14789529 | cg20641545 | cg10478292 | cg01055281 |
| cg25246692 | cg02608002 | cg02590886 | cg03562264 | cg25179685 | cg11750080 | cg22741823 | cg24823488 | cg18676110 | cg05981968 |
| cg27527874 | cg19392326 | cg16466893 | cg22303846 | cg23205183 | cg08142478 | cg06376619 | cg23089438 | cg01176329 | cg19099034 |
| cg01595554 | cg09820084 | cg00448525 | cg16265442 | cg10789584 | cg24749831 | cg09303778 | cg08428512 | cg26221243 | cg15801020 |
| cg21803052 | cg09638407 | cg25215890 | cg21567756 | cg08698668 | cg18773937 | cg25326690 | cg08080919 | cg04704294 | cg06952236 |
| cg17582637 | cg06960024 | cg18352995 | cg11408333 | cg17421097 | cg12057615 | cg24711094 | cg05434863 | cg04363768 | cg01331196 |
| cg22755445 | cg25804470 | cg06559916 | cg01952088 | cg02075261 | cg05437995 | cg11741987 | cg16891895 | cg05298434 | cg06451957 |
| cg21491092 | cg24291027 | cg01076082 | cg14841796 | cg18984165 | cg18750620 | cg09348748 | cg25305001 | cg19509829 | cg22227034 |
| cg03519239 | cg00326902 | cg21601585 | cg22378492 | cg26315802 | cg09302474 | cg26444348 | cg17732521 | cg04582010 | cg25623451 |
| cg23210365 | cg01068044 | cg12248040 | cg10830374 | cg01433488 | cg07838205 | cg17516106 | cg06917217 | cg12154164 | cg10990350 |
| cg00261534 | cg11293217 | cg23992886 | cg10027760 | cg13262048 | cg07756783 | cg13782302 | cg27271532 | cg10508359 | cg12322373 |
| cg13517056 | cg13812894 | cg17451435 | cg11174848 | cg19134764 | cg14962343 | cg10607692 | cg09359480 | cg21326516 | cg03808459 |
| cg17964532 | cg15136600 | cg15559584 | cg02903525 | cg12962226 | cg01979352 | cg23820429 | cg07060948 | cg21566860 | cg03451731 |
| cg07777628 | cg10486274 | cg22657923 | cg14981807 | cg07807575 | cg19411729 | cg26441142 | cg02187892 | cg04828696 | cg20055841 |
| cg26293201 | cg13454226 | cg13646880 | cg10883827 | cg19308222 | cg14155388 | cg02238178 | cg13581759 | cg09226087 | cg08073003 |
| cg12292060 | cg15874872 | cg03334071 | cg06687109 | cg06211357 | cg04661674 | cg06288821 | cg15259691 | cg22337605 | cg17299732 |
| cg02702688 | cg24667728 | cg01177906 | cg07188645 | cg19456996 | cg11166252 | cg13576586 | cg22381317 | cg19518756 | cg01435493 |
| cg06326853 | cg03215701 | cg02887507 | cg05112298 | cg25199836 | cg05670459 | cg04200931 | cg15050748 | cg25864633 | cg24647339 |
| cg01842473 | cg05694621 | cg25797006 | cg06857159 | cg04126707 | cg18220666 | cg11665114 | cg26112639 | cg13295193 | cg02892690 |
| cg11504635 | cg05144147 | cg00602234 | cg20376899 | cg02483931 | cg07329296 | cg11694510 | cg11154552 | cg23032965 | cg10443999 |
| cg22327543 | cg23656380 | cg08744769 | cg07427439 | cg16803522 | cg13960493 | cg07839627 | cg24190415 | cg19529363 | cg20666492 |
| cg00935119 | cg13915702 | cg18541417 | cg19822518 | cg24770595 | cg06162279 | cg07455685 | cg00042205 | cg09010346 | cg09791102 |
| cg23844188 | cg17160604 | cg04790357 | cg22797703 | cg15524170 | cg09847652 | cg01292486 | cg18285813 | cg02605874 | cg12110437 |
| cg18284616 | cg09053081 | cg06151964 | cg07832354 | cg06243126 | cg06045655 | cg04147428 | cg19187155 | cg16331972 | cg15801357 |
| cg14214214 | cg24085215 | cg08515370 | cg25479038 | cg10711035 | cg21445366 | cg20704819 | cg22664064 | cg15722603 | cg07335619 |
| cg23993628 | cg16348358 | cg19456164 | cg07415266 | cg01553433 | cg11595545 | cg09121849 | cg08666011 | cg07250315 | cg08264335 |
| cg12143168 | cg06658912 | cg21569150 | cg24357890 | cg16541031 | cg12204957 | cg26279786 | cg00613369 | cg21183028 | cg12864409 |
| cg11971461 | cg03715613 | cg19177600 | cg11297934 | cg18395935 | cg19518069 | cg11490446 | cg01027405 | cg04963482 | cg01992922 |
| cg10935550 | cg08113628 | cg01964650 | cg20689626 | cg08260052 | cg18085866 | cg01439892 | cg05687149 | cg14424530 | cg01089087 |
| cg08120796 | cg18890364 | cg11646192 | cg14633721 | cg15289769 | cg03042113 | cg07053114 | cg02318426 | cg00953201 | cg22196946 |
| cg16628093 | cg24824075 | cg06575193 | cg03129172 | cg11706349 | cg09881253 | cg02273392 | cg19955419 | cg07845895 | cg21991396 |
| cg24824686 | cg17806418 | cg14491628 | cg19493601 | cg12302912 | cg03980304 | cg21109025 | cg07830103 | cg24570656 | cg00725995 |
| cg20853903 | cg02381064 | cg22657351 | cg08679238 | cg27430612 | cg04860432 | cg16283790 | cg26199576 | cg25690285 | cg27632621 |
| cg27382910 | cg18118503 | cg14818002 | cg06460023 | cg24088258 | cg18875274 | cg20935025 | cg19844675 | cg18964839 | cg23193277 |
| cg10189525 | cg11086820 | cg10473390 | cg17671280 | cg10576257 | cg08896849 | cg04053163 | cg23542859 | cg16143430 | cg17105249 |
| cg25799590 | cg13104385 | cg17244098 | cg15650664 | cg00458322 | cg20289913 | cg05652719 | cg21308760 | cg00729815 | cg02007364 |
| cg07316313 | cg11665613 | cg26635576 | cg01629558 | cg06519422 | cg07584981 | cg08497766 | cg06802812 | cg00429105 | cg05852416 |
| cg23760603 | cg10765083 | cg21738582 | cg04120164 | cg16730743 | cg25401200 | cg24997497 | cg24627299 | cg02503933 | cg03258475 |
| cg12579212 | cg09738346 | cg14202655 | cg06608414 | cg08786644 | cg08826460 | cg25365610 | cg27606396 | cg06837842 | cg01418795 |
| cg04256691 | cg14069320 | cg17532626 | cg16718891 | cg16029801 | cg10407869 | cg12244758 | cg07639900 | cg03689552 | cg17542758 |
| cg01897756 | cg00380266 | cg20689228 | cg15726426 | cg00797102 | cg00717218 | cg09075476 | cg07793849 | cg26959689 | cg09425228 |
| cg25432696 | cg00759707 | cg08353606 | cg17556150 | cg23202109 | cg04057485 | cg25823070 | cg06403784 | cg14505800 | cg14754581 |
| cg06528343 | cg13277298 | cg14331002 | cg08033130 | cg08374596 | cg24663636 | cg03961676 | cg17648644 | cg02413470 | cg13989982 |
| cg12955992 | cg00318865 | cg10498690 | cg12419228 | cg01706029 | cg21644740 | cg15737819 | cg02532928 | cg18110243 | cg07164722 |
| cg03338959 | cg03680354 | cg01385765 | cg00260437 | cg07128590 | cg12074883 | cg27490629 | cg02073664 | cg15819646 | cg25886076 |
| cg08493324 | cg14292528 | cg14318946 | cg22538688 | cg24139898 | cg16903846 | cg13390101 | cg05417087 | cg23852535 | cg13401811 |
| cg26925114 | cg15829081 | cg03241471 | cg24030587 | cg25826331 | cg23055315 | cg04971865 | cg26189983 | cg13027384 | cg13571484 |
| cg22116492 | cg14508578 | cg07773137 | cg06373167 | cg07747986 | cg20169450 | cg13827970 | cg07606806 | cg22826226 | cg17271677 |
| cg20521377 | cg05397629 | cg18719198 | cg00995327 | cg00736744 | cg08568920 | cg26328906 | cg12863545 | cg14227435 | cg02495670 |
| cg21810305 | cg20498089 | cg26876914 | cg04859800 | cg01400476 | cg20355062 | cg22559350 | cg15655655 | cg20433392 | cg14006309 |
| cg01889574 | cg08245420 | cg15747933 | cg03341909 | cg17356733 | cg02792780 | cg09899712 | cg20004134 | cg12586428 | cg05524354 |
| cg07724977 | cg08193100 | cg24663170 | cg01582182 | cg03477080 | cg06003169 | cg13836770 | cg08677655 | cg23039279 | cg25724441 |
| cg13810988 | cg21484586 | cg18799953 | cg17083411 | cg05388761 | cg11132223 | cg19778026 | cg14470647 | cg07195404 | cg25184780 |
| cg13308243 | cg24748786 | cg22078638 | cg14177325 | cg05379312 | cg14587604 | cg26282150 | cg27083787 | cg09611124 | cg00237947 |
| cg02606526 | cg10177231 | cg26382148 | cg02604407 | cg22504285 | cg19732273 | cg01654446 | cg12467404 | cg12723862 | cg16415863 |
| cg03290614 | cg10836855 | cg13844287 | cg02824029 | cg00443276 | cg07512814 | cg25596327 | cg23247337 | cg06710101 | cg11585301 |
| cg16686951 | cg07347534 | cg05701235 | cg15262317 | cg11609995 | cg11466773 | cg25810036 | cg03234188 | cg05999287 | cg09549848 |
| cg05740439 | cg03038262 | cg18542050 | cg12001977 | cg02026948 | cg16501116 | cg19406094 | cg14338803 | cg26376566 | cg06960824 |
| cg15450246 | cg15559867 | cg05727225 | cg11176186 | cg21779443 | cg19733463 | cg07104388 | cg16582156 | cg00021101 | cg24326142 |
| cg01583099 | cg13041684 | cg24323253 | cg16874710 | cg20989595 | cg17080709 | cg27217194 | cg13720472 | cg26019704 | cg13678532 |
| cg11209631 | cg24710752 | cg25093583 | cg08926982 | cg06461841 | cg12491496 | cg02152968 | cg17082299 | cg06950392 | cg23883019 |
| cg01442589 | cg26619389 | cg21640508 | cg20486877 | cg05197625 | cg15156584 | cg10832291 | cg26779716 | cg02035199 | cg15801573 |
| cg17160660 | cg25789723 | cg21707255 | cg25667490 | cg07734160 | cg00398248 | cg25823578 | cg08409335 | cg06411688 | cg07463991 |
| cg19699994 | cg01506627 | cg20867125 | cg26896911 | cg11553245 | cg11751927 | cg22707679 | cg13023397 | cg26317587 | cg01092365 |
| cg17838734 | cg11989199 | cg01185754 | cg09041862 | cg14471619 | cg27250053 | cg15412604 | cg04973680 | cg05027549 | cg21220462 |
| cg20112699 | cg25950728 | cg07617205 | cg26661416 | cg04544784 | cg02464093 | cg15440563 | cg05729093 | cg10878085 | cg01648751 |
| cg06210240 | cg17590234 | cg05963956 | cg11473433 | cg09208942 | cg13051037 | cg03738444 | cg10730349 | cg09852411 | cg20831735 |
| cg11659652 | cg02882624 | cg27665171 | cg27432785 | cg26224280 | cg15852258 | cg26129669 | cg17307510 | cg05759269 | cg06834437 |
| cg23026886 | cg05006071 | cg25169445 | cg00731304 | cg03975690 | cg15387055 | cg08460475 | cg10240056 | cg22798977 | cg07334977 |
| cg12876142 | cg25774457 | cg02941951 | cg17350720 | cg24715735 | cg21266330 | cg07716603 | cg21180072 | cg02288344 | cg09800026 |
| cg04020792 | cg14111380 | cg07914107 | cg00564714 | cg22536150 | cg21581096 | cg12204395 | cg06804581 | cg04118903 | cg11056055 |
| cg12090003 | cg27416629 | cg10075584 | cg17505251 | cg03466998 | cg17102276 | cg01242833 | cg16021018 | cg17767975 | cg16837548 |
| cg17538088 | cg23332193 | cg10618262 | cg24523650 | cg07790896 | cg09885409 | cg09047471 | cg18229820 | cg11968639 | cg13815314 |
| cg03768171 | cg04038163 | cg04145323 | cg07839313 | cg14441271 | cg14590560 | cg26597539 | cg12405214 | cg12298155 | cg01565508 |
| cg01316433 | cg12632948 | cg03067369 | cg20445467 | cg05408686 | cg26060132 | cg14744768 | cg17904717 | cg06181567 | cg08414819 |
| cg02236874 | cg10287137 | cg21170794 | cg08858437 | cg16178186 | cg12130935 | cg26416566 | cg02610823 | cg21366457 | cg03612522 |
| cg01186777 | cg01554777 | cg08964563 | cg00839584 | cg20983042 | cg00692010 | cg06623274 | cg10449675 | cg17726558 | cg14563260 |
| cg02027541 | cg07436579 | cg01361328 | cg08383171 | cg10807045 | cg08688086 | cg05954917 | cg17958598 | cg17399352 | cg12278959 |
| cg15088679 | cg26785317 | cg24176566 | cg03354771 | cg25701517 | cg09774179 | cg20318143 | cg16599007 | cg14575950 | cg18710569 |
| cg23992714 | cg15195276 | cg16711866 | cg27657350 | cg06308857 | cg22006798 | cg03108606 | cg17847560 | cg18100219 | cg21263170 |
| cg26129270 | cg26661257 | cg02201457 | cg17850367 | cg08671647 | cg13595604 | cg19808587 | cg17123655 | cg14926149 | cg23757899 |
| cg04852236 | cg09387599 | cg13129272 | cg01971407 | cg08151642 | cg13186112 | cg24721836 | cg04509825 | cg15327954 | cg10805822 |
| cg00111978 | cg08542804 | cg04824304 | cg08575688 | cg26124115 | cg14594330 | cg18392893 | cg06107116 | cg09265315 | cg12166917 |
| cg27273157 | cg10914655 | cg21213426 | cg21091378 | cg24509815 | cg14191360 | cg11925568 | cg02251743 | cg10698419 | cg00532455 |
| cg05309505 | cg02967706 | cg00805867 | cg05941961 | cg23095260 | cg00054971 | cg00169167 | cg19772754 | cg01704939 | cg01306510 |
| cg21459921 | cg02613171 | cg23281215 | cg07549671 | cg11920449 | cg02093647 | cg27207274 | cg21428887 | cg12615753 | cg17986407 |
| cg08613981 | cg19112204 | cg10752421 | cg02925736 | cg03517712 | cg16795804 | cg04066686 | cg13075971 | cg22892369 | cg01182555 |
| cg18409654 | cg06945627 | cg12522705 | cg03691156 | cg19306864 | cg12803878 | cg13091538 | cg04948941 | cg19850370 | cg13920312 |
| cg24417482 | cg16322406 | cg00119197 | cg14299235 | cg05460606 | cg20299263 | cg00483219 | cg21686213 | cg04935109 | cg12087371 |
| cg08178815 | cg06958110 | cg13546043 | cg17174660 | cg25003358 | cg10140158 | cg02625241 | cg11308893 | cg07538364 | cg00822110 |
| cg25330093 | cg13933891 | cg03095533 | cg06829293 | cg22874046 | cg24280925 | cg27220062 | cg12991791 | cg08423052 | cg10213935 |
| cg06170501 | cg03807636 | cg06239836 | cg05797333 | cg21992594 | cg27472701 | cg13749544 | cg23211714 | cg06734005 | cg13070763 |
| cg21288861 | cg01020263 | cg21988813 | cg21781600 | cg01793179 | cg14170545 | cg19138900 | cg25367691 | cg23678386 | cg19582265 |
| cg03768727 | cg14850771 | cg04437751 | cg03085155 | cg21199870 | cg26826631 | cg27539322 | cg04324598 | cg03375332 | cg24621801 |
| cg23381664 | cg15750809 | cg09775258 | cg10675363 | cg05482837 | cg11642722 | cg01449321 | cg01715276 | cg00446900 | cg25611880 |
| cg25571973 | cg16536964 | cg05664296 | cg25554943 | cg23974023 | cg25720552 | cg21308660 | cg10155695 | cg06280592 | cg09583374 |
| cg21690645 | cg15370577 | cg14377523 | cg04970593 | cg12718193 | cg23583420 | cg13244804 | cg15599642 | cg20857612 | cg23320034 |
| cg21911992 | cg20617093 | cg13443122 | cg11077949 | cg14526204 | cg15085372 | cg05683227 | cg09885325 | cg05423001 | cg04008252 |
| cg09440298 | cg02719489 | cg24685317 | cg06022673 | cg15393946 | cg26217489 | cg12020362 | cg14796318 | cg04432599 | cg03337243 |
| cg23826899 | cg15321496 | cg03136390 | cg03076047 | cg16518861 | cg20989454 | cg22579218 | cg02042605 | cg12455187 | cg05105845 |
| cg07658578 | cg12640402 | cg12544907 | cg00189457 | cg25905215 | cg24716010 | cg15234271 | cg22331096 | cg19945092 | cg19372359 |
| cg00650386 | cg03637691 | cg10248357 | cg02674789 | cg18430624 | cg17389218 | cg27410952 | cg06942027 | cg20067272 | cg20461585 |
| cg17553286 | cg12055610 | cg17564205 | cg02207200 | cg20680592 | cg26302731 | cg07830167 | cg11640275 | cg14473344 | cg09459794 |
| cg02400708 | cg17169348 | cg16188589 | cg14554511 | cg01433189 | cg14214323 | cg13374249 | cg08676905 | cg11209538 | cg03247892 |
| cg16198151 | cg08848643 | cg11108080 | cg15430294 | cg10315334 | cg06503674 | cg00207965 | cg00394040 | cg05071077 | cg25829320 |
| cg25727806 | cg09689592 | cg24379495 | cg00334798 |  |  |  |  |  |  |
